# Supplementary material for: Synthesis of New (E)-2-(1H-Indole-3-ylcarbonyl)-3-heteroaryl-acrylonitriles via Microwave-Assisted Knoevenagel Condensation
Source: Hindawi journal article supplement (doi:10.1155/2017/8418930), 2017-01-01

## SUPPORTING INFORMATION FOR

### Synthesis of New (*E*)-2-(1*H*-indole-3-ylcarbonyl)-3-heteroaryl-acrylonitriles Via Microwave-Assisted Knoevenagel Condensation.

Adriana V. Treuer<sup>1</sup>, Pedro De- la- Torre<sup>1</sup>, Margarita I. Gutiérrez<sup>1, \*</sup>

<sup>1</sup>Organic Synthesis Laboratory and Biological Activity (LSO-Act-Bio), Institute of Chemistry of Natural Resources, Universidad de Talca, Chile.

\*Corresponding author: Margarita Gutierrez, Ph.D., Organic Synthesis Laboratory and Biological Activity (LSO-Act-Bio), Institute of Chemistry of Natural Resources, Universidad de Talca, P.O. Box 747, Talca 3460000, Chile E-mail: mgutierrez@utalca.cl

Page

S1. FT-IR, <sup>1</sup>H-NMR, <sup>13</sup>C-NMR and ESI-MS spectra of new compounds

(3a-i).....2-14

## S1. FT-IR, $^1\text{H}$ NMR, $^{13}\text{C}$ NMR and ESI-MS spectra of new compounds

**3a:** (*E*)-2-(1*H*-indole-3-ylcarbonyl)-3-(5-chloro-3-methyl-1-phenyl-1*H*-pyrazol-4-yl)-acrylonitrile

IR: **3a**

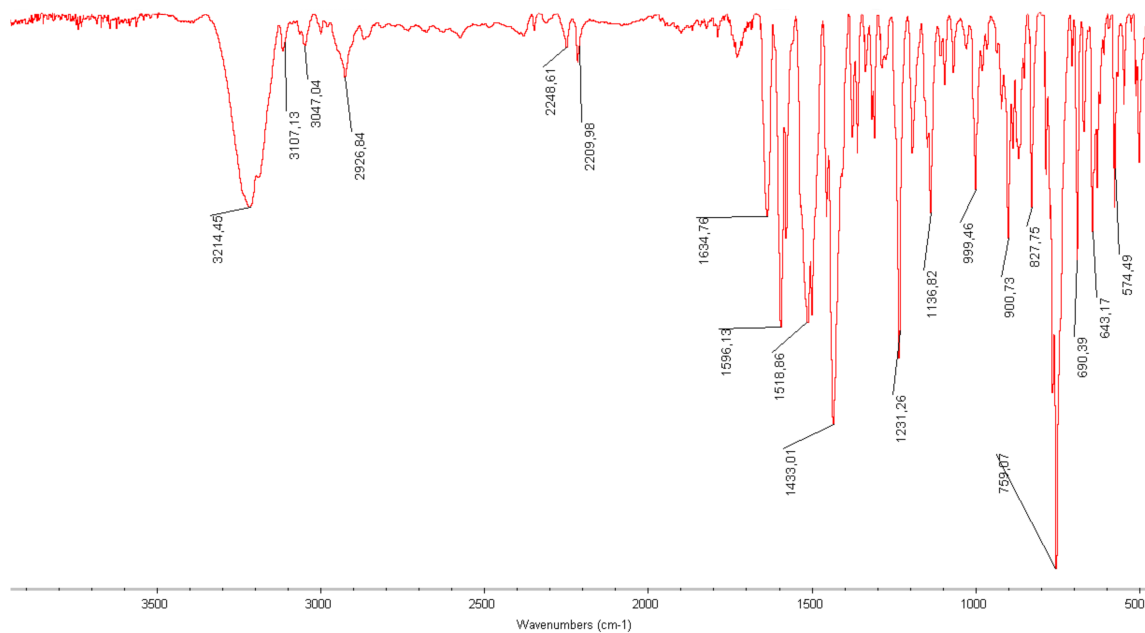

$^1\text{H}$ -NMR: **3a**

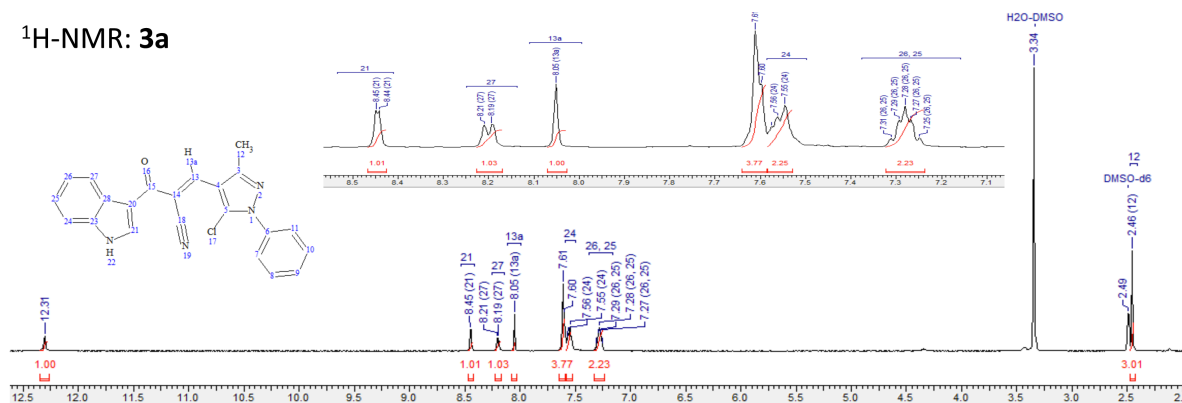

<sup>13</sup>C-NMR: **3a**

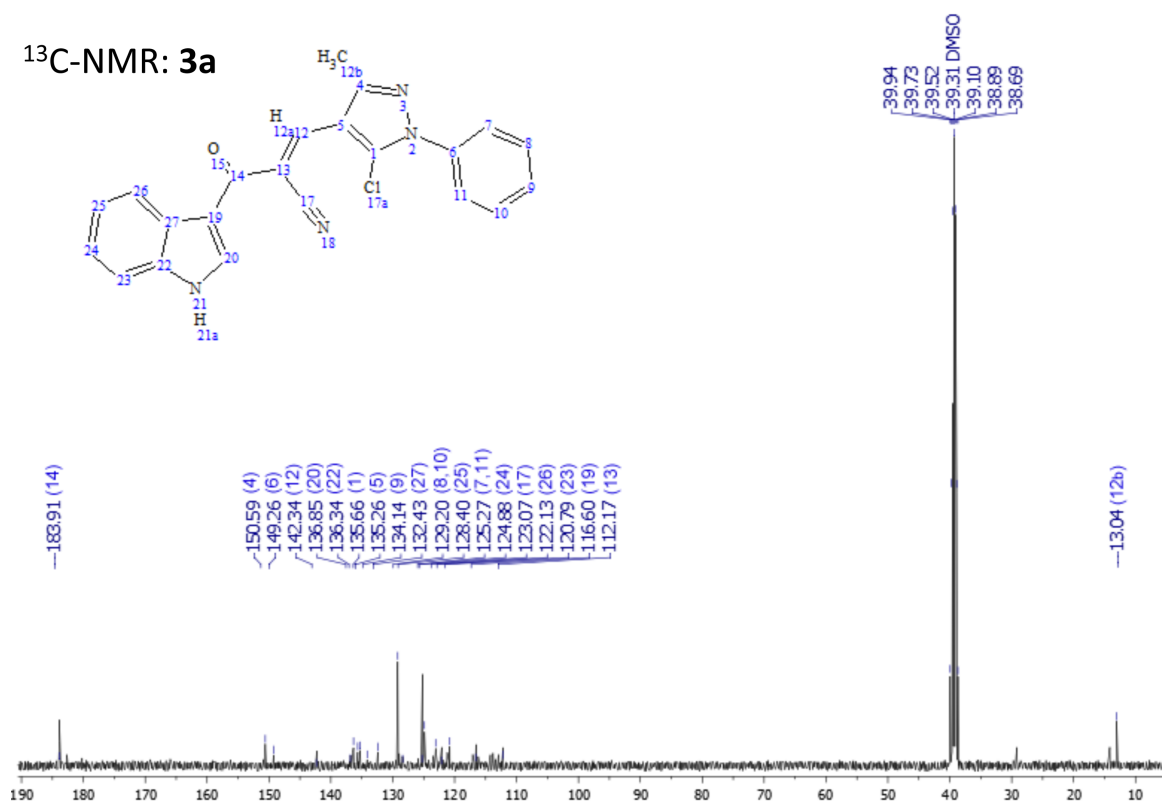

ADRIANA T **3a** 68 (12.328)

TOF MS ES+  
23

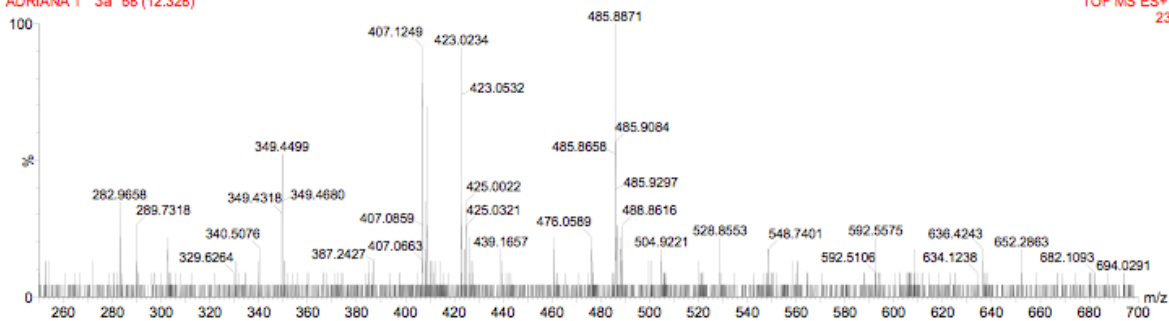

**3b:** (*E*)-2-(1*H*-indole-3-ylcarbonyl)-3-(1-methyl-1*H*-imidazol-2-yl)-acrylonitrile

**IR: 3b**

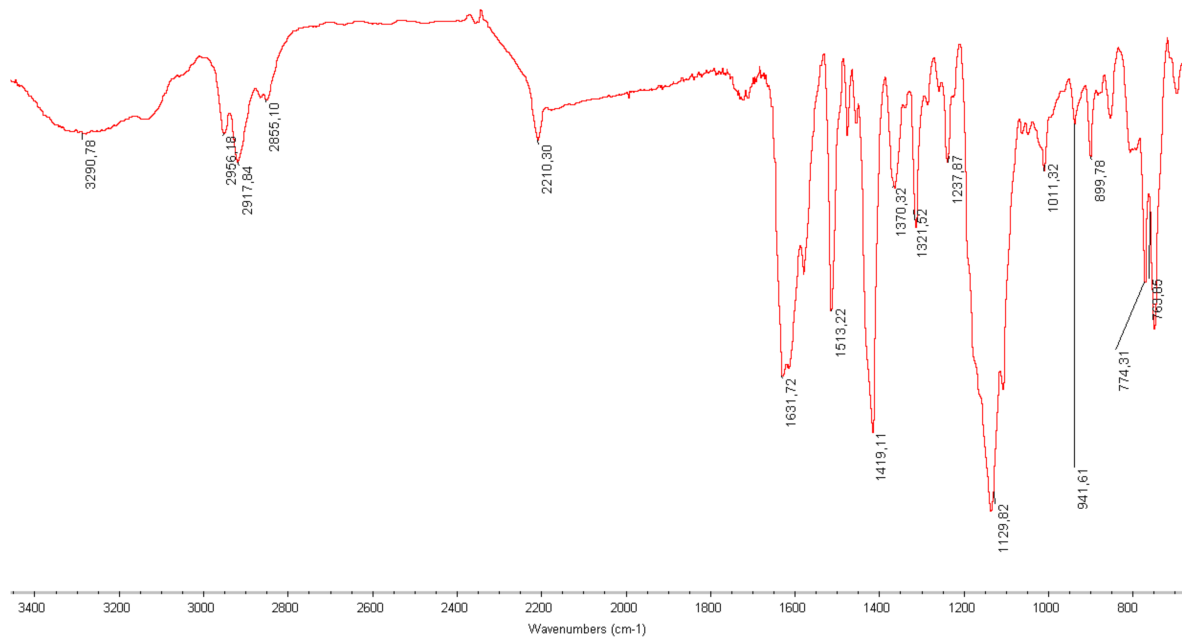

**<sup>1</sup>H-NMR: 3b**

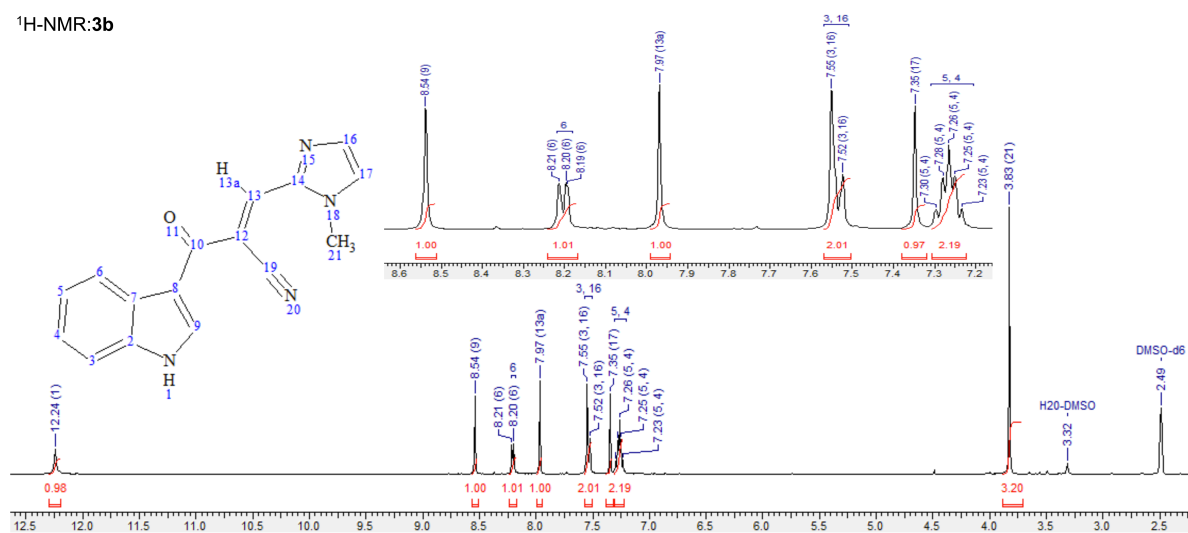



<sup>13</sup>C-NMR: **3b**

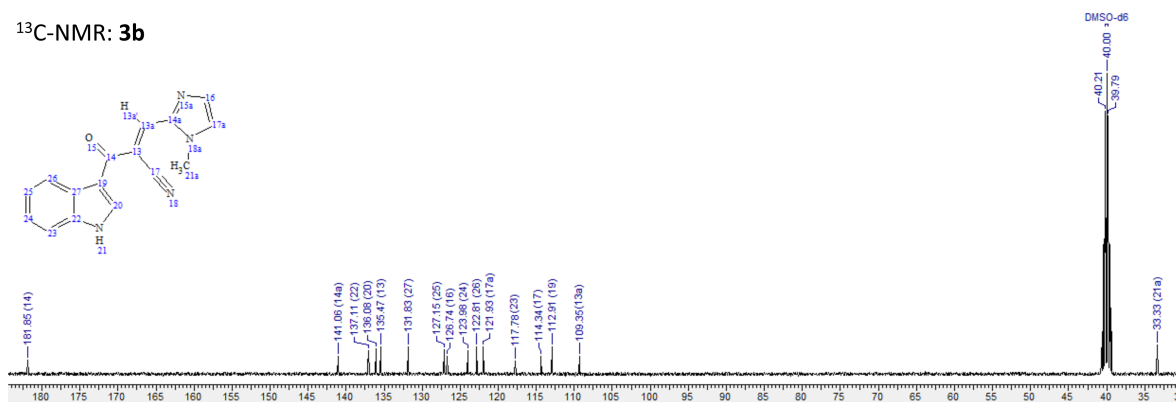

ADRIANAT **3b** 50 (9.064)

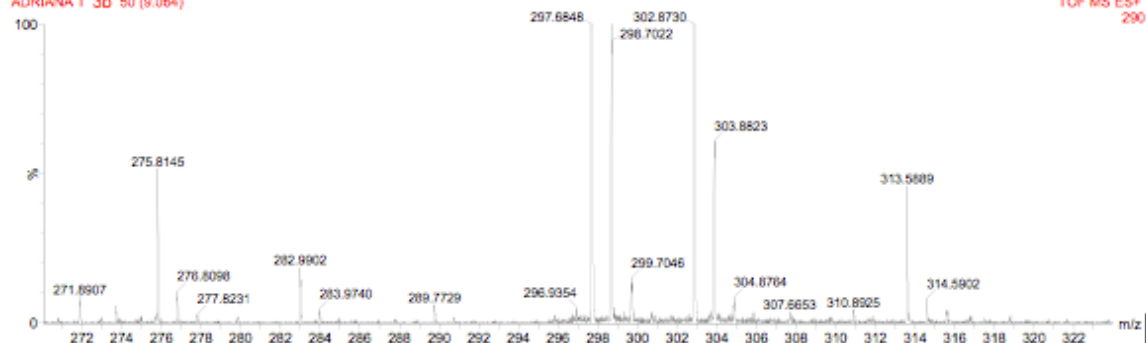

**3c**: (*E*)-2-(1*H*-indole-3-ylcarbonyl)-3-(1*H*-imidazol-2-yl)-acrylonitrile

IR: **3c**

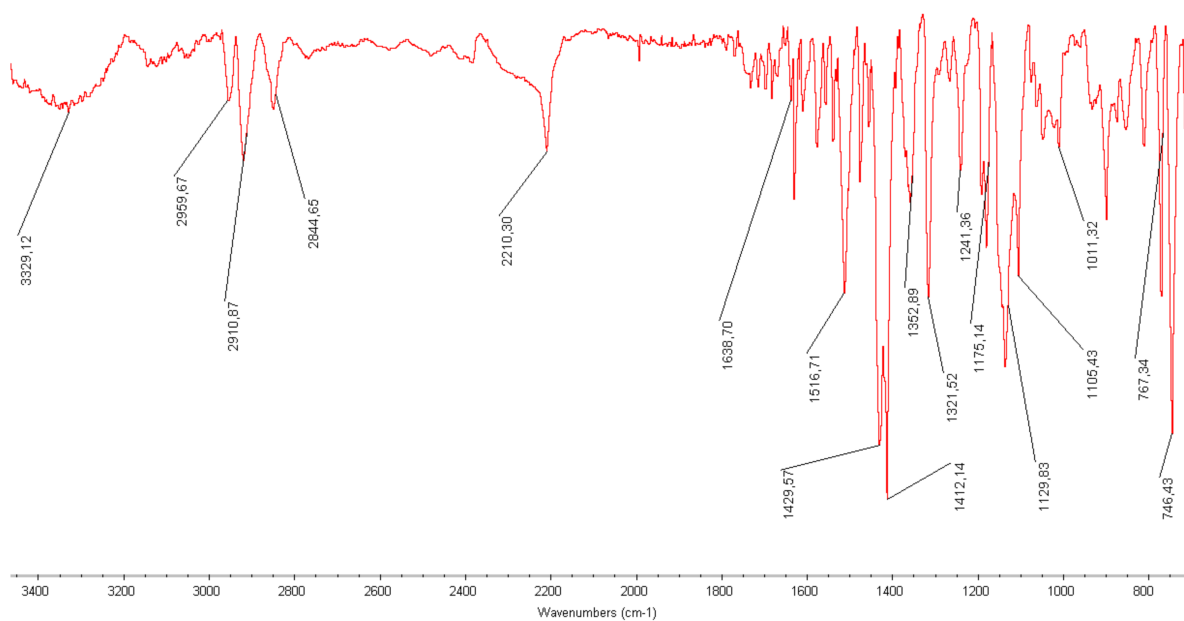

<sup>1</sup>H-NMR: 3c

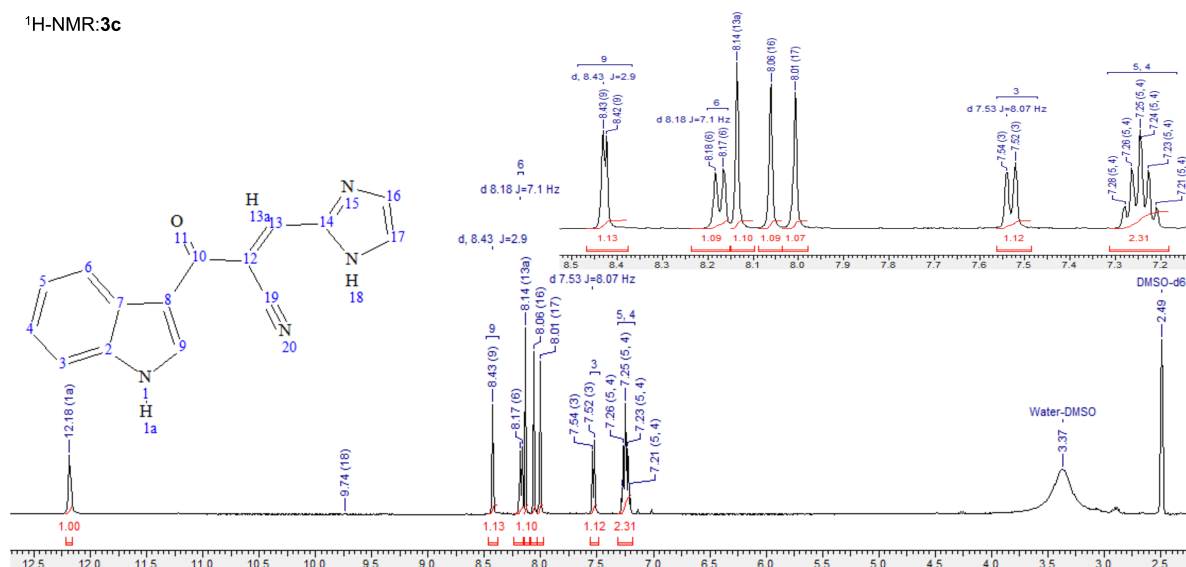

<sup>13</sup>C-NMR: 3c

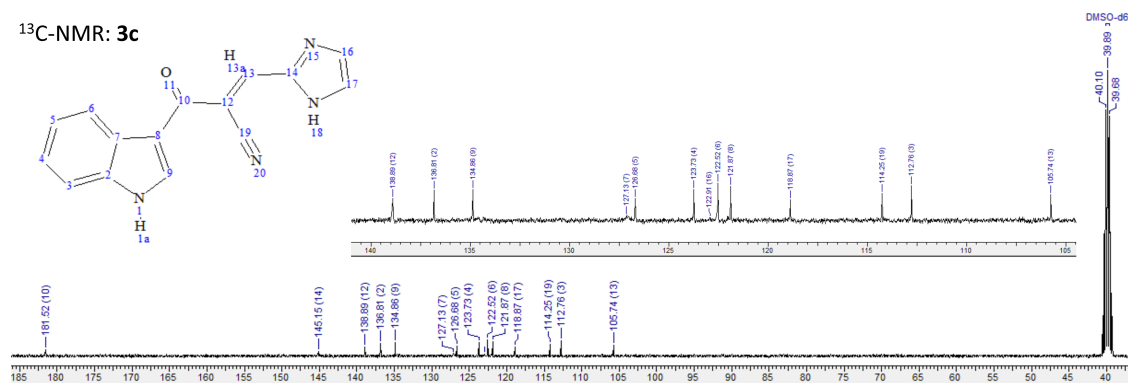

ADRIANA T 3c 53 (9.608)

TOF MS ES+  
99

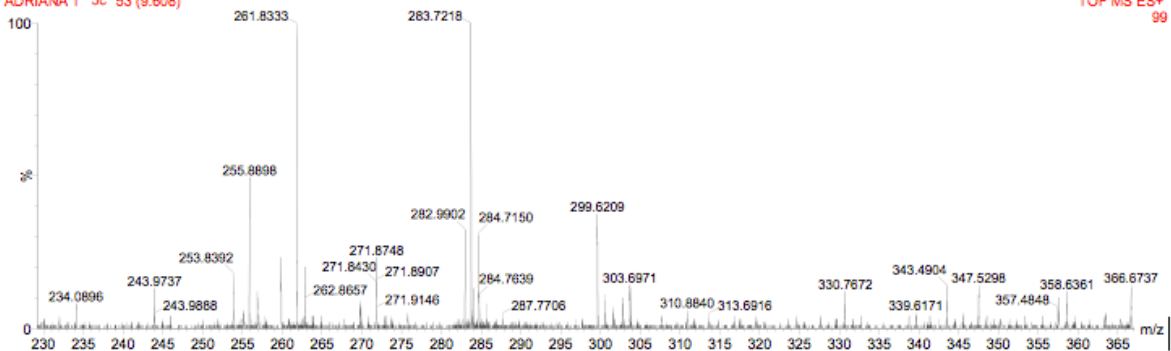

**3d:** (*E*)-2-(1*H*-indole-3-ylcarbonyl) 3-(*tert*-butyl-4-phenylpiperazine-1-carboxyl)-acrylonitrile

**IR: 3d**

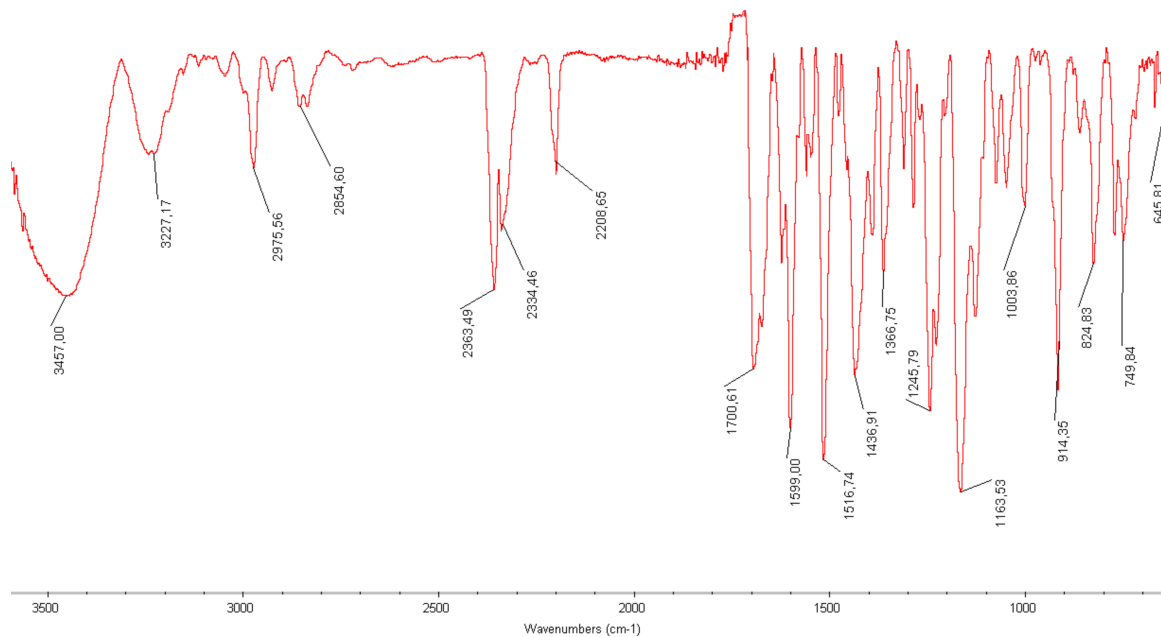

**<sup>1</sup>H-NMR: 3d**

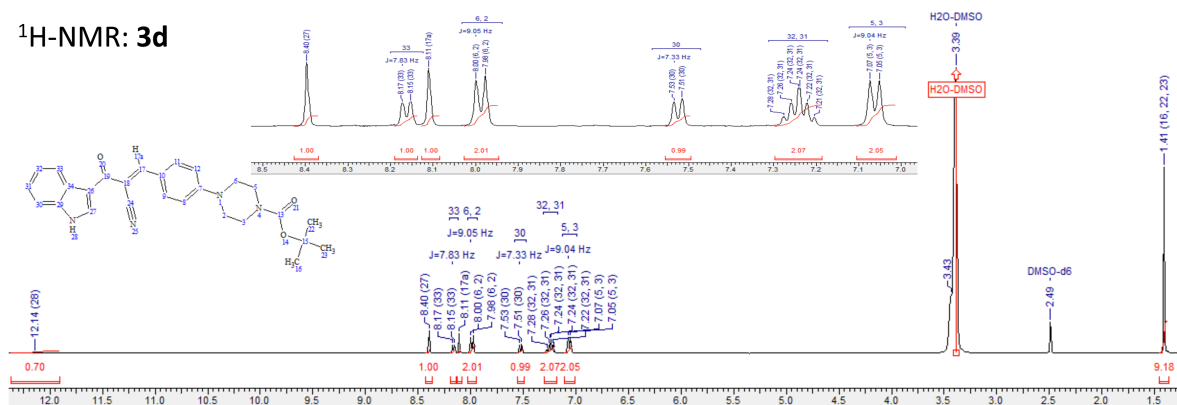

**<sup>13</sup>C-NMR: 3d**

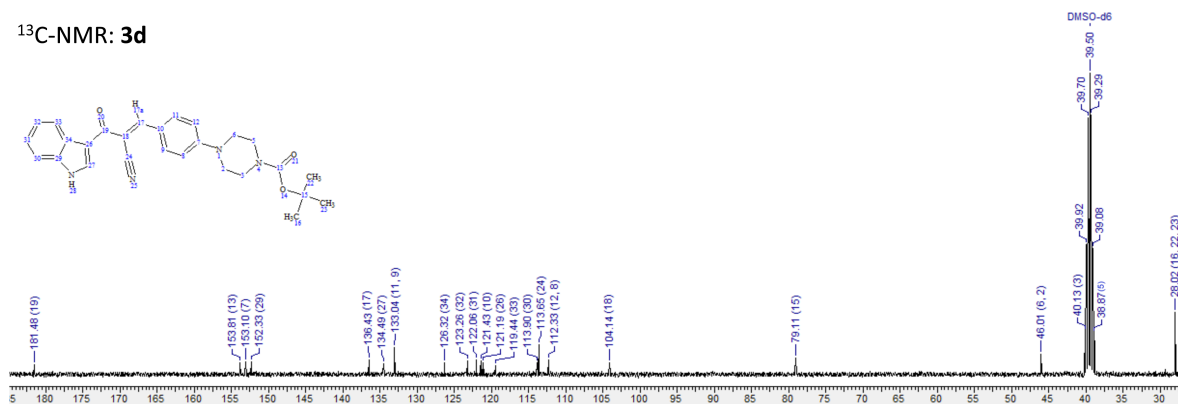

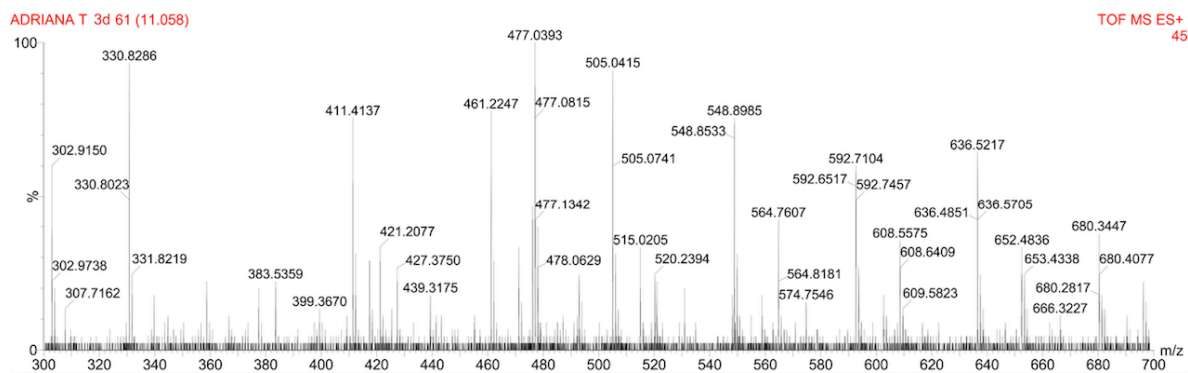

**3e:** (*E*)-2-(1*H*-indole-3-ylcarbonyl)-3-(5-(4-fluorophenyl)isoxazol-3-yl)-acrylonitrile

IR: **3e**

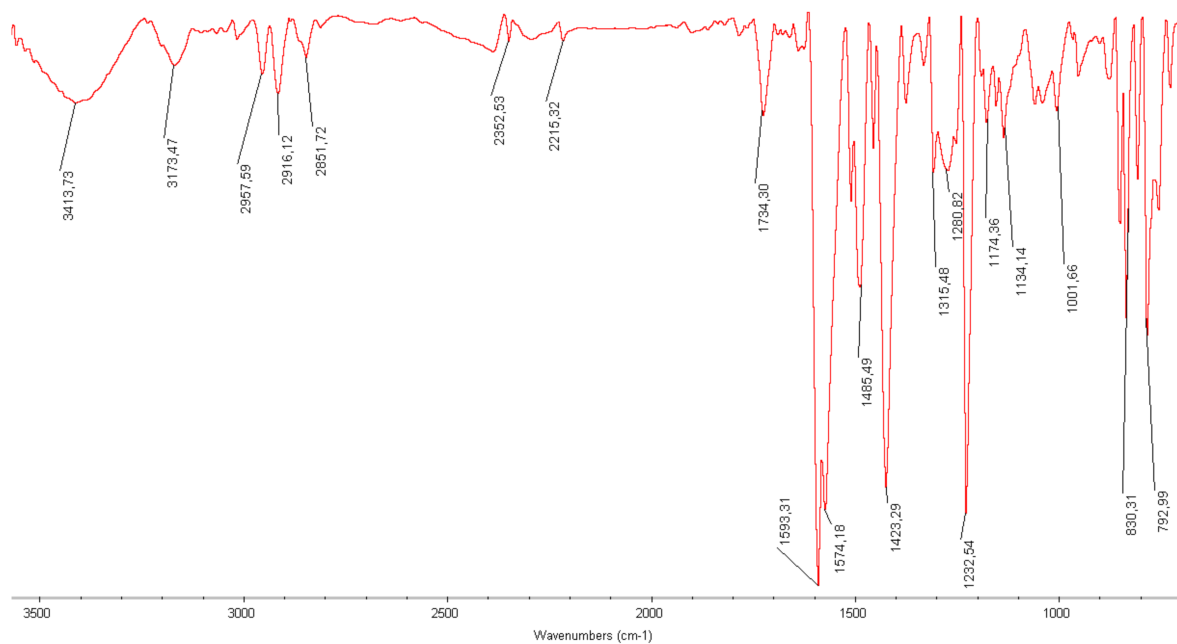

**<sup>1</sup>H-NMR: 3e**

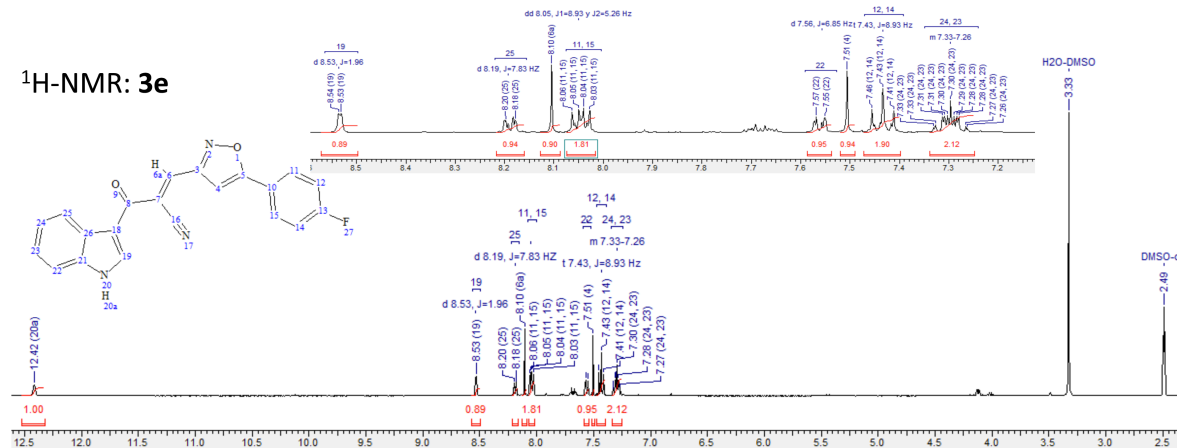

**<sup>13</sup>C-NMR: 3e**

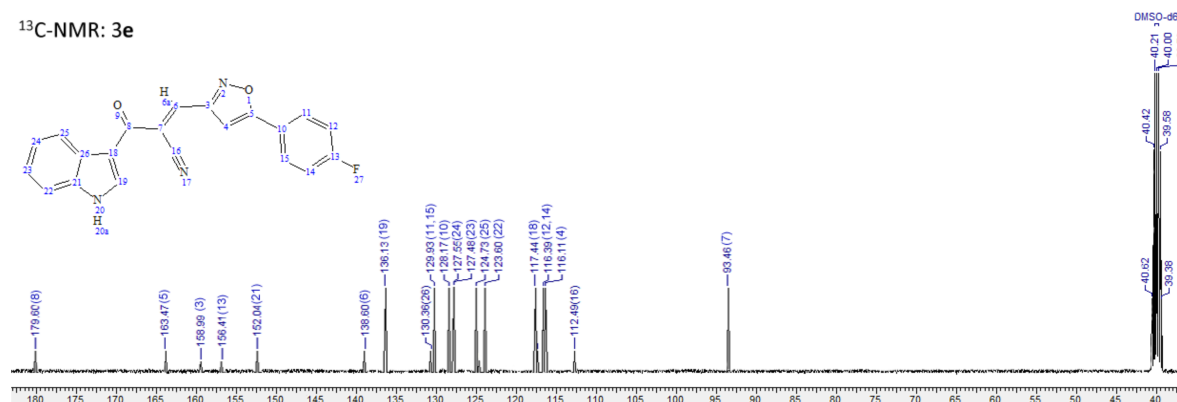

ADRIANA T 3e 28 (5.076)

TOF MS ES+  
4.73e3

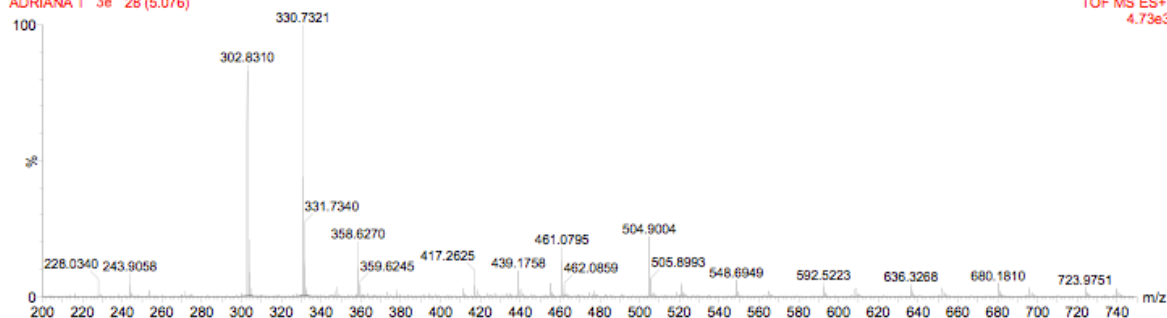



<sup>13</sup>C-NMR: **3f**

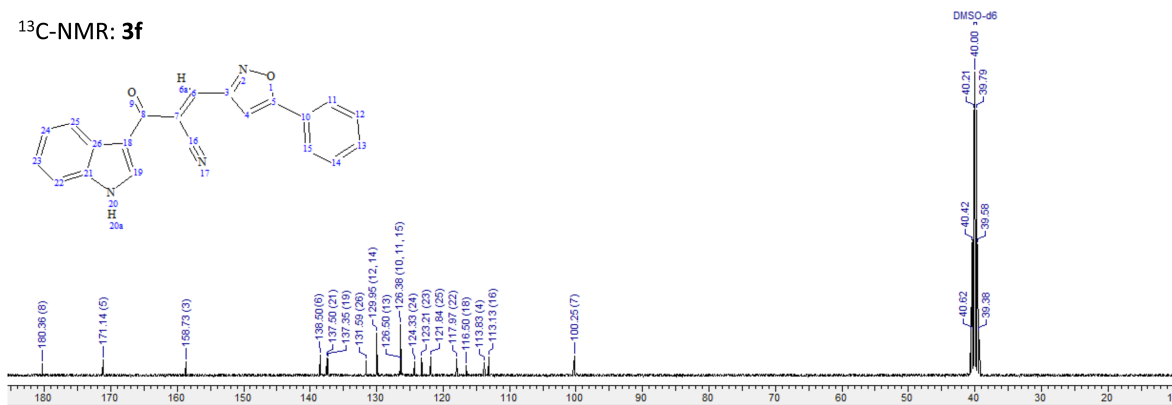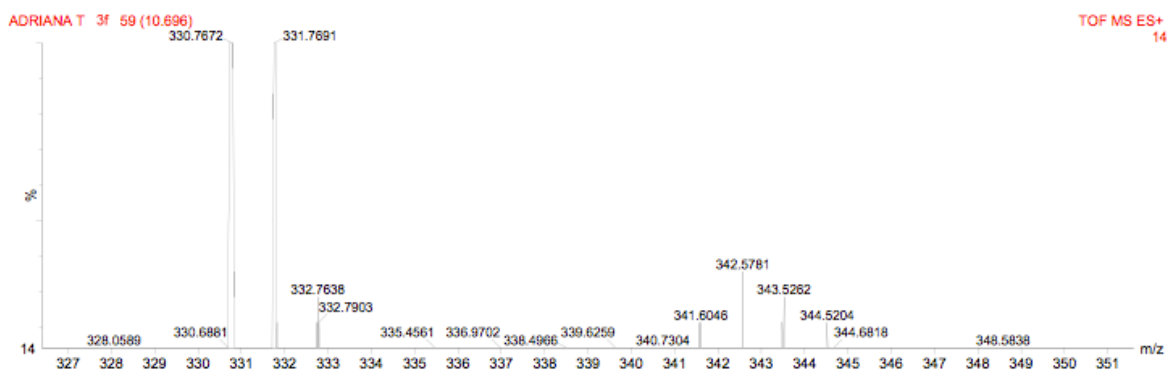

**3g**: (E)-2-(1H-indole-3-ylcarbonyl)-3-(5-(4-nitrophenyl)furan-2-yl)-acrylonitrile

IR: **3g**

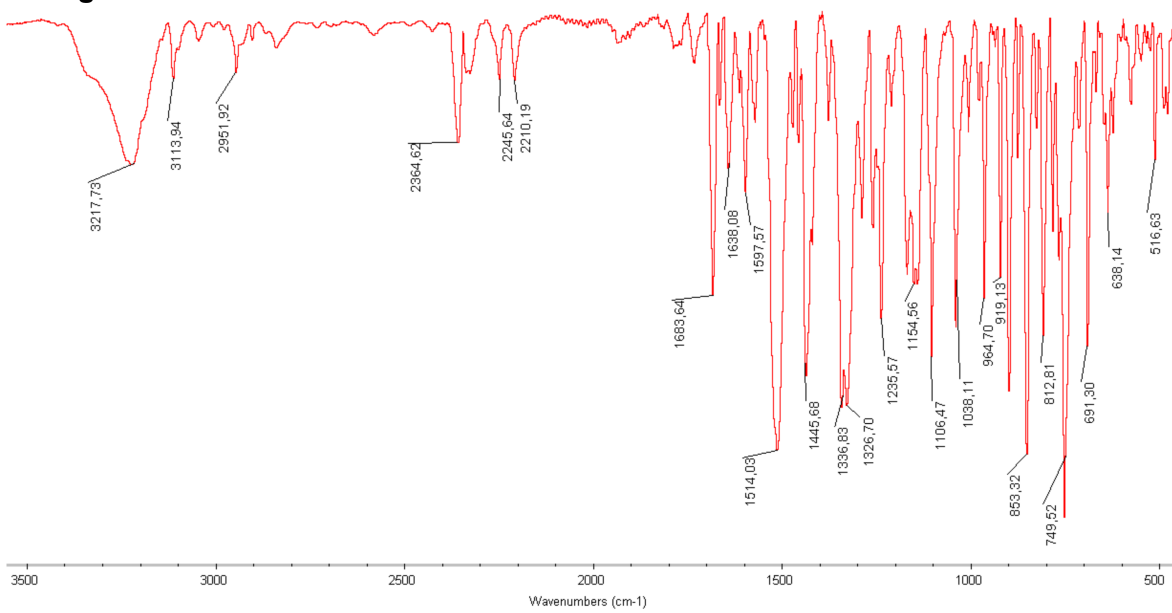

<sup>1</sup>H-NMR: 3g

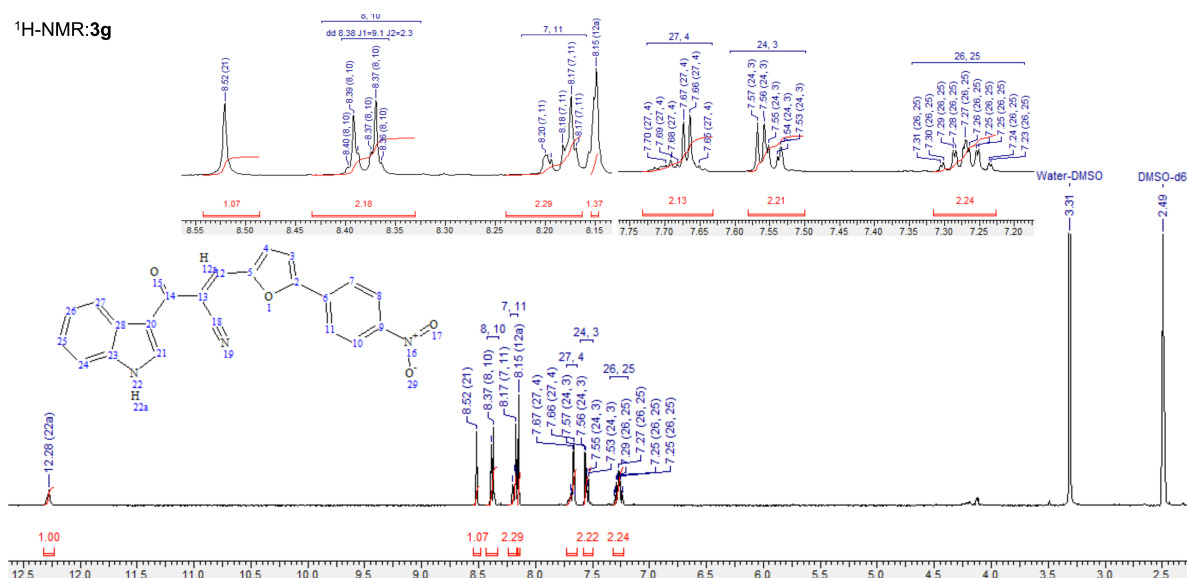

<sup>13</sup>C-NMR: 3g

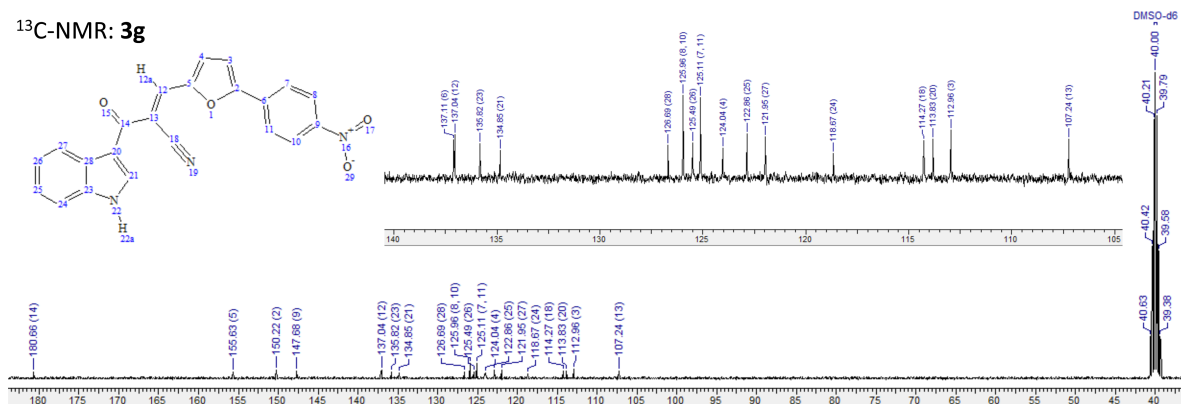

ADRIANA T. 3g 30 (5.440)

TOF MS ES+  
29

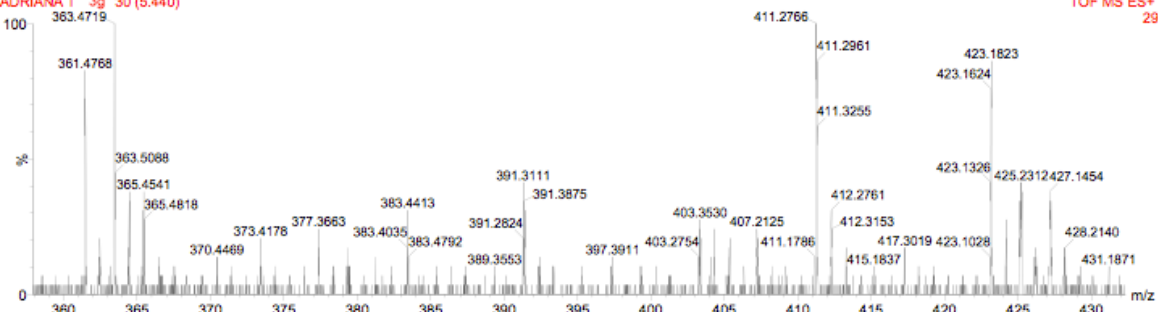



**3h:** (*E*)-2-(1*H*-indole-3-ylcarbonyl)-3-(5-(4-chlorophenyl)furan-2-yl)-acrylonitrile

IR: **3h**

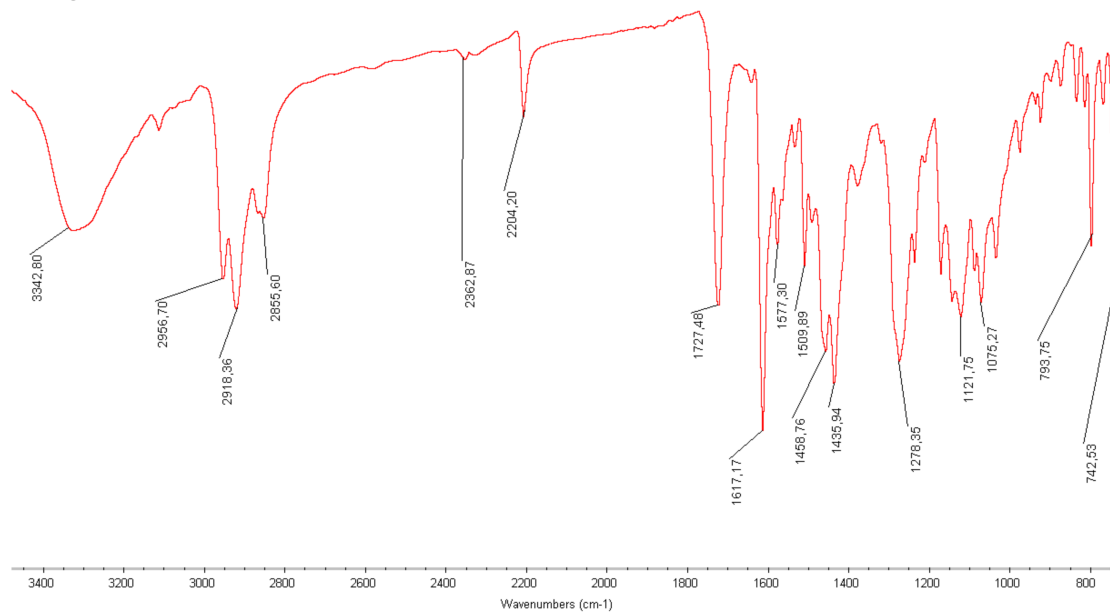

<sup>1</sup>H-NMR: **3h**

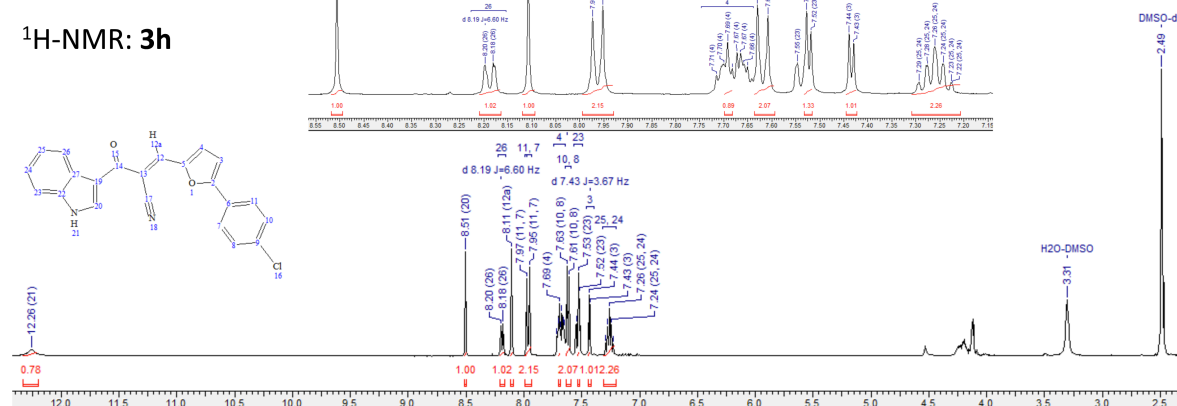

<sup>13</sup>C-NMR: **3h**

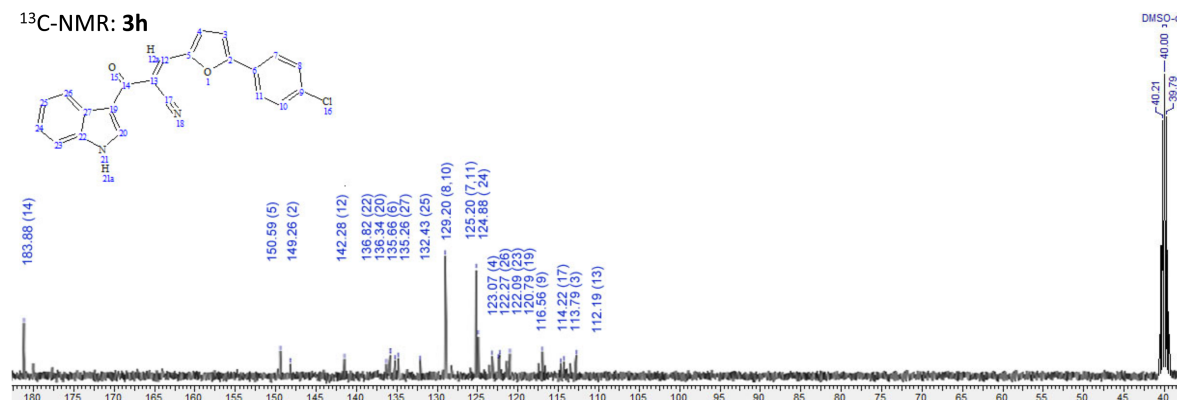

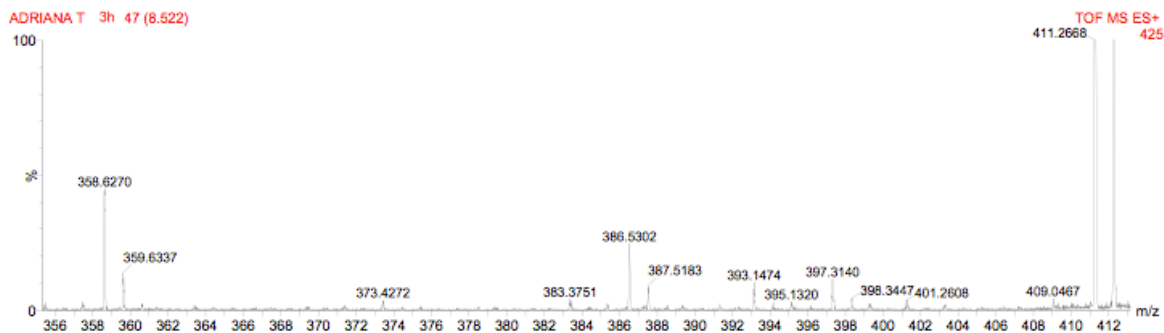

**3i:** (*E*)-2-(1*H*-indole-3-ylcarbonyl)-3-(4-oxo-4*H*-chromen-3-yl)-acrylonitrile

IR: **3i**

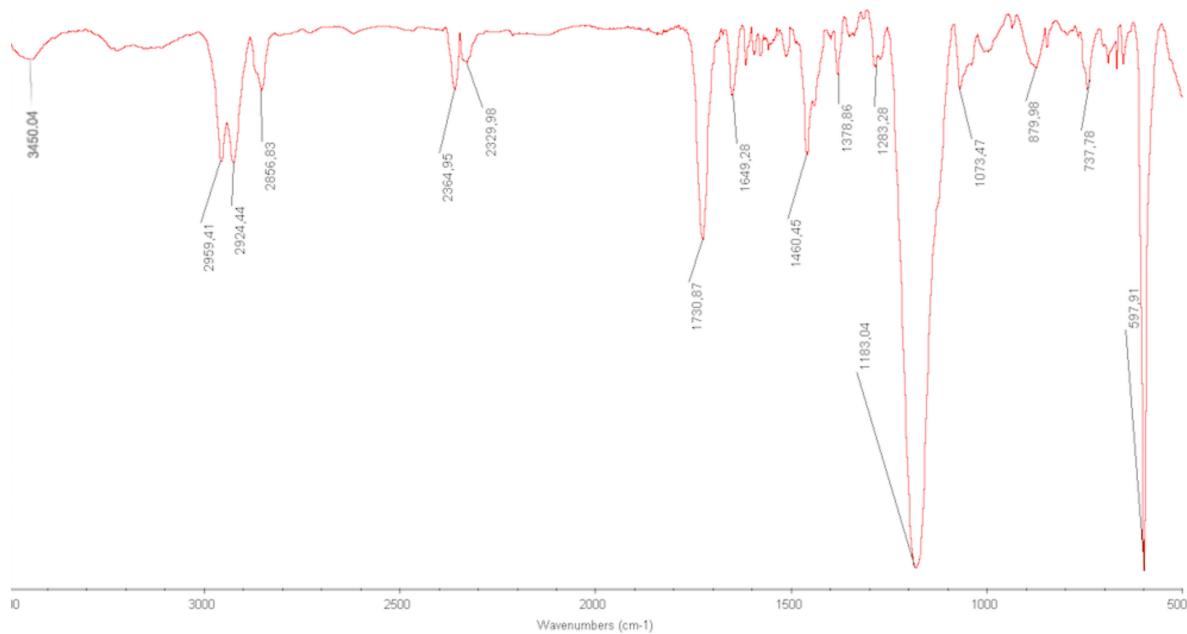

<sup>1</sup>H-NMR: **3i**

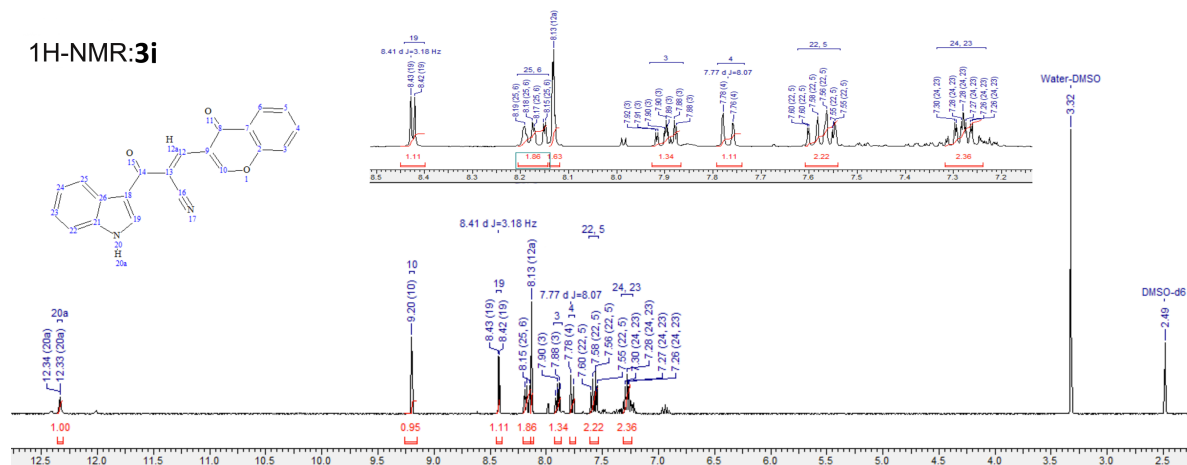

<sup>13</sup>C-NMR: **3i**

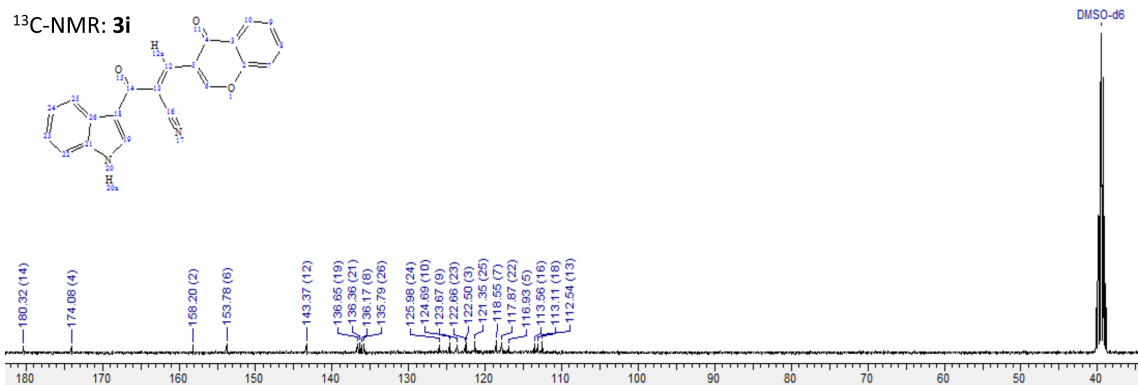

ADRIANA T **3i** 29 (5.258)

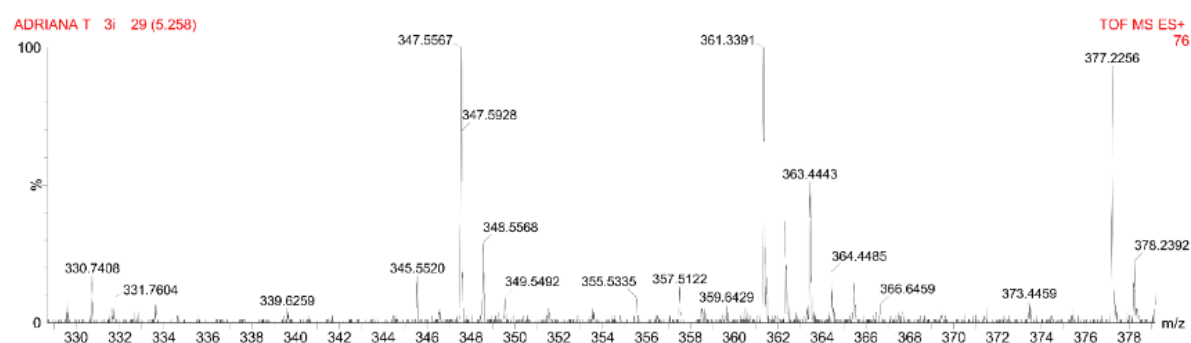

Supplement: f1 [file 8418930.f1.pdf]
